# Supplementary material
Source: HighWire-hosted journal article supplement (https://ez-admanager.com/highwire/filestream/135654/field_highwire_adjunct_files/2/Video_legends.pdf)
Supplement: Video_legends.pdf [file Video_legends.pdf]

Video 1: shows patient 1 with spinocerebellar ataxia type 3. Note that the patient has antecollis associated with tilt and twist. There is no tremor, bradykinesia and the gait is normal without ataxia.

Video 2: shows patient 2 with spinocerebellar ataxia type 3. Note that the patient has significant retrocollis, normal finger nose test, tandem gait and no ataxia.
